# Supplementary material for: Association of social support and religiosity with survival among women with breast cancer in a low-income population in the Southeastern United States
Source: Springer Nature journal article supplement (doi:10.1186/s12889-025-21908-z), 2025-02-20
Supplement: MOESM1 [file 12889_2025_21908_MOESM1_ESM.pdf]

**MARKING INSTRUCTIONS**

Please use a No. 2 pencil or black or blue ink only.  
Print legible numbers and capital block letters in the boxes.

Correct Numbers and Letters

Correct Mark

Incorrect Marks

|   |   |   |   |   |   |
|---|---|---|---|---|---|
| 1 | 2 | 3 | A | B | C |
|---|---|---|---|---|---|

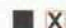

X

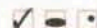**C O N T A C T   I N F O R M A T I O N**

Name: \_\_\_\_\_

Home Address: \_\_\_\_\_

City: \_\_\_\_\_

State: \_\_\_\_\_

Zip Code: \_\_\_\_\_

Mailing Address: \_\_\_\_\_

(if different from home address)

Telephone numbers:

HOME

|   |  |  |   |  |  |   |  |  |  |  |
|---|--|--|---|--|--|---|--|--|--|--|
| ( |  |  | ) |  |  | - |  |  |  |  |
|---|--|--|---|--|--|---|--|--|--|--|

WORK

|   |  |  |   |  |  |   |  |  |  |  |
|---|--|--|---|--|--|---|--|--|--|--|
| ( |  |  | ) |  |  | - |  |  |  |  |
|---|--|--|---|--|--|---|--|--|--|--|

EXT.

|  |  |  |  |  |  |
|--|--|--|--|--|--|
|  |  |  |  |  |  |
|--|--|--|--|--|--|

CELL

|   |  |  |   |  |  |   |  |  |  |  |
|---|--|--|---|--|--|---|--|--|--|--|
| ( |  |  | ) |  |  | - |  |  |  |  |
|---|--|--|---|--|--|---|--|--|--|--|

e-Mail Address: \_\_\_\_\_

**G E N E R A L   B A C K G R O U N D   I N F O R M A T I O N**

1. What is your date of birth?

Month

Day

Year

|  |  |  |  |  |  |
|--|--|--|--|--|--|
|  |  |  |  |  |  |
|--|--|--|--|--|--|

2. What is your sex?

☐ Male☐ Female

3. How much do you weigh?

Pounds

|  |  |  |
|--|--|--|
|  |  |  |
|--|--|--|

4. What was your weight at age 21?

Pounds

|  |  |  |
|--|--|--|
|  |  |  |
|--|--|--|

5. What is the most you have ever weighed, not counting weight during pregnancy?

Pounds

|  |  |  |
|--|--|--|
|  |  |  |
|--|--|--|

6. How tall are you?

Feet

Inches

|  |  |  |
|--|--|--|
|  |  |  |
|--|--|--|

7. Which of the following describes your race or ethnic background? (Mark all that apply)

- ☐ White
- ☐ Black/African-American
- ☐ Hispanic/Latino
- ☐ Asian or Pacific Islander
- ☐ American Indian or Alaska Native
- ☐ Other racial or ethnic group

8. What is the highest grade or level of education you have completed? (Mark the highest)

- ☐ Less than 9 years
- ☐ 9-11 years
- ☐ Completed high school or GED
- ☐ Vocational, technical, or business training
- ☐ Some college or Junior college
- ☐ Graduated from college
- ☐ Graduate school (up to and including a Master's degree)
- ☐ Graduate school beyond a Master's degree (including doctors, dentists, lawyers, PhDs)

9. Which of the following describes your total household income last year?

- ☐ Less than \$15,000  
☐ \$15,000 - \$24,999  
☐ \$25,000 - \$49,999  
☐ \$50,000 - \$99,999  
☐ \$100,000 or more

10. Where were you born?

- ☐ In the U.S.A. → which state?   
☐ Outside the U.S.A.

11. Have you ever lived in a rural or farming community, or on a farm?

- ☐ Yes → For how many years did you live in a rural or farming community, or on a farm? [If less than one year, enter 00.]  
☐ No

Years

12. How many full brothers do you have? (Include any that may have died):

13. How many full sisters do you have? (Include any that may have died):

14. Are you a twin or a triplet (or quadruplet)?

- ☐ Yes  
☐ No

15. Which of the following describes your current marital status?

- ☐ Married, or living as married with a partner  
☐ Separated or divorced  
☐ Widowed  
☐ Single - never been married

16. How many people live in your household now, including yourself?

## TOBACCO USE

17. Whether or not you smoke, about HOW MANY HOURS PER WEEK are you around the cigarette smoke of OTHER PEOPLE?

Hours per week

In your home:

Hours per week

In other indoor places (including work):

18. Have you smoked at least 100 cigarettes in your entire life?

- ☐ Yes → At what age did you start to smoke?   
☐ No → Go to question 22.

19. Do you smoke cigarettes now?

- ☐ Yes  
☐ No → At what age did you quit?

20. What is the average number of cigarettes that you smoke (or used to smoke, if you have quit) in one day?

21. Are the cigarettes you usually smoke (or used to smoke, if you have quit) menthol?

- ☐ Yes  
☐ No

22. In your entire life:

Have you smoked at least 20 CIGARS?

- ☐ Yes → Do you STILL smoke cigars?  
☐ No

- ☐ Yes →  
☐ No

How much do you use? [If less than one, enter 00.]

cigars per day

For how many years have you used this tobacco product? [If less than one year, enter 00.]

years

Have you smoked at least 20 PIPESFULL OF TOBACCO?

- ☐ Yes → Do you STILL smoke pipes?  
☐ No

- ☐ Yes →  
☐ No

pipesfull per day

years

Have you used at least 1 bag of CHEWING TOBACCO?

- ☐ Yes → Do you STILL use chewing tobacco?  
☐ No

- ☐ Yes →  
☐ No

plugs per day

years



## 22. In your entire life:

Have you used at least 1 can of SNUFF?

- ☐ Yes ☒ No

Do you STILL use snuff?

- ☐ Yes ☒ No

How much do you use? [If less than one, enter 00.]



dips per day

For how many years have you used this tobacco product? [If less than one year, enter 00.]



years

## MEDICAL HISTORY

## 23. Has a doctor ever told you that you have had any of the following conditions, or have you ever been treated for any of the following conditions?

|                                                                                                                                                                                                                                                            | Mark if "Yes"            | WHAT WAS YOUR AGE AT FIRST DIAGNOSIS      |                                          | Mark if "Yes"            | WHAT WAS YOUR AGE AT FIRST DIAGNOSIS      |
|------------------------------------------------------------------------------------------------------------------------------------------------------------------------------------------------------------------------------------------------------------|--------------------------|-------------------------------------------|------------------------------------------|--------------------------|-------------------------------------------|
| High blood pressure (not during pregnancy)                                                                                                                                                                                                                 | <input type="checkbox"/> | <input type="text"/> <input type="text"/> | Heartburn or acid reflux                 | <input type="checkbox"/> | <input type="text"/> <input type="text"/> |
| Diabetes or high blood sugar (not during pregnancy)                                                                                                                                                                                                        | <input type="checkbox"/> | <input type="text"/> <input type="text"/> | Ulcer (stomach or duodenal)              | <input type="checkbox"/> | <input type="text"/> <input type="text"/> |
| Heart attack or coronary artery bypass surgery                                                                                                                                                                                                             | <input type="checkbox"/> | <input type="text"/> <input type="text"/> | Crohn's disease or ulcerative colitis    | <input type="checkbox"/> | <input type="text"/> <input type="text"/> |
| High cholesterol                                                                                                                                                                                                                                           | <input type="checkbox"/> | <input type="text"/> <input type="text"/> | Glaucoma                                 | <input type="checkbox"/> | <input type="text"/> <input type="text"/> |
| Stroke/mini-stroke/transient ischemic attack (TIA)                                                                                                                                                                                                         | <input type="checkbox"/> | <input type="text"/> <input type="text"/> | Cataracts                                | <input type="checkbox"/> | <input type="text"/> <input type="text"/> |
| Hepatitis                                                                                                                                                                                                                                                  | <input type="checkbox"/> | <input type="text"/> <input type="text"/> | HIV/AIDS                                 | <input type="checkbox"/> | <input type="text"/> <input type="text"/> |
| (If yes, which type?) <input checked="" type="checkbox"/> A<br>(Mark all that apply) <input type="checkbox"/> B<br><input type="checkbox"/> C<br><input type="checkbox"/> Don't know<br><input type="checkbox"/> Other type (Specify) <input type="text"/> |                          |                                           | Parkinson's disease                      | <input type="checkbox"/> | <input type="text"/> <input type="text"/> |
| Emphysema or chronic bronchitis                                                                                                                                                                                                                            | <input type="checkbox"/> | <input type="text"/> <input type="text"/> | Lupus (systemic lupus erythematosus/SLE) | <input type="checkbox"/> | <input type="text"/> <input type="text"/> |
| Tuberculosis (TB)                                                                                                                                                                                                                                          | <input type="checkbox"/> | <input type="text"/> <input type="text"/> | Multiple sclerosis                       | <input type="checkbox"/> | <input type="text"/> <input type="text"/> |
| Asthma                                                                                                                                                                                                                                                     | <input type="checkbox"/> | <input type="text"/> <input type="text"/> | Depression                               | <input type="checkbox"/> | <input type="text"/> <input type="text"/> |
| Hayfever, skin allergy, food allergy, or other allergy                                                                                                                                                                                                     | <input type="checkbox"/> | <input type="text"/> <input type="text"/> | Arthritis                                | <input type="checkbox"/> | <input type="text"/> <input type="text"/> |
| Sickle cell disease                                                                                                                                                                                                                                        | <input type="checkbox"/> | <input type="text"/> <input type="text"/> | Non-cancerous cyst in the breast         | <input type="checkbox"/> | <input type="text"/> <input type="text"/> |
| Polyps in colon or rectum                                                                                                                                                                                                                                  | <input type="checkbox"/> | <input type="text"/> <input type="text"/> | Fibroids in the uterus (womb)            | <input type="checkbox"/> | <input type="text"/> <input type="text"/> |

23. Has a doctor ever told you that you have had any of the following conditions, or have you ever been treated for any of the following conditions?

CANCER of any kind

☐ Yes  
☐ No

If yes, what type of cancer?

WHAT WAS YOUR AGE AT FIRST DIAGNOSIS?

☐ Breast

☐ Prostate

☐ Colorectal

☐ Lung

☐ Uterine/endometrial

☐ Cervical

☐ Non-melanoma skin

☐ Other (specify):

☐ Other (specify):

|  |  |
|--|--|
|  |  |
|  |  |
|  |  |
|  |  |
|  |  |
|  |  |
|  |  |
|  |  |
|  |  |

F A M I L Y   H I S T O R Y   O F   C A N C E R

24. Has your BIRTH MOTHER ever had cancer?

☐ Yes

☐ No

☐ Don't Know

If yes, what kind of cancer did your BIRTH MOTHER have?

Was she diagnosed before she was 50 years old?

☐ Breast

→

☐ Yes

☐ No

☐ Don't Know

☐ Colorectal

→

☐ Yes

☐ No

☐ Don't Know

☐ Lung

→

☐ Yes

☐ No

☐ Don't Know

☐ Uterine/endometrial

→

☐ Yes

☐ No

☐ Don't Know

☐ Cervical

→

☐ Yes

☐ No

☐ Don't Know

☐ Ovarian

→

☐ Yes

☐ No

☐ Don't Know

☐ Stomach

→

☐ Yes

☐ No

☐ Don't Know

☐ Other (specify):

→

☐ Yes

☐ No

☐ Don't Know

☐ Other (specify):

→

☐ Yes

☐ No

☐ Don't Know



25. If you have any FULL SISTERS, have any ever had cancer?

☐ Yes ☐ No ☐ Don't Know

If yes, what kind of cancer did she (or they) have?

How many sisters had this cancer?

Were any sisters diagnosed before age 50?

☐ Breast

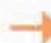


sisters

☐ Yes ☐ No ☐ Don't Know

☐ Colorectal

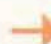


sisters

☐ Yes ☐ No ☐ Don't Know

☐ Lung

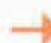


sisters

☐ Yes ☐ No ☐ Don't Know

☐ Uterine/endometrial

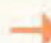


sisters

☐ Yes ☐ No ☐ Don't Know

☐ Cervical

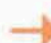


sisters

☐ Yes ☐ No ☐ Don't Know

☐ Ovarian

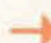


sisters

☐ Yes ☐ No ☐ Don't Know

☐ Stomach

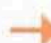


sisters

☐ Yes ☐ No ☐ Don't Know

☐ Other (specify):

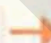


sisters

☐ Yes ☐ No ☐ Don't Know

☐ Other (specify):

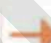


sisters

☐ Yes ☐ No ☐ Don't Know

26. Has your BIRTH FATHER ever had cancer?

☐ Yes ☐ No ☐ Don't Know

If yes, what kind of cancer did your BIRTH FATHER have?

Was he diagnosed before he was 50 years old?

☐ Prostate

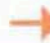

☐ Yes ☐ No ☐ Don't Know

☐ Colorectal

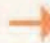

☐ Yes ☐ No ☐ Don't Know

☐ Lung

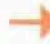

☐ Yes ☐ No ☐ Don't Know

☐ Stomach

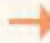

☐ Yes ☐ No ☐ Don't Know

☐ Throat/pharynx

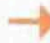

☐ Yes ☐ No ☐ Don't Know

☐ Other (specify):

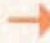

☐ Yes ☐ No ☐ Don't Know

☐ Other (specify):

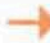

☐ Yes ☐ No ☐ Don't Know

# FAMILY HISTORY OF CANCER

27. If you have any FULL BROTHERS, have any ever had cancer?

☐ Yes ☐ No ☐ Don't Know

If yes, what kind of cancer did he (or they) have?

How many brothers had this cancer?

Were any brothers diagnosed before age 50?

☐ Prostate

→  brothers

☐ Yes ☐ No ☐ Don't Know

☐ Colorectal

→  brothers

☐ Yes ☐ No ☐ Don't Know

☐ Lung

→  brothers

☐ Yes ☒ No ☐ Don't Know

☐ Stomach

→  brothers

☐ Yes ☐ No ☐ Don't Know

☐ Throat/pharynx

→  brothers

☐ Yes ☐ No ☐ Don't Know

☐ Other (specify):

→  brothers

☐ Yes ☐ No ☐ Don't Know

☐ Other (specify):

→  brothers

☐ Yes ☐ No ☐ Don't Know

# FAMILY HISTORY OF HEART DISEASE

28. Have any of the following family members had a heart attack or had coronary artery bypass surgery?

Mark if "Yes"

If yes, at what age did this first occur?

Birth Mother

☐

☐ ≤55

☐ 56-64

☐ 65+

Birth Father

☐

☐ ≤55

☐ 56-64

☐ 65+

Full Sister(s)

☐

☐ ≤55

☐ 56-64

☐ 65+

Full Brother(s)

☐

☐ ≤55

☐ 56-64

☐ 65+

[Mark the youngest age that applies if more than one full brother or full sister has had these heart problems.]

# FAMILY HISTORY OF DIABETES

29. Have any of the following family members had diabetes or high blood sugar?

Mark if "Yes"

If yes, at what age was this first diagnosed?

Birth Mother

☐

☐ ≤19

☐ 20-64

☐ 65+

Birth Father

☐

☐ ≤19

☐ 20-64

☐ 65+

Full Sister(s)

☐

☐ ≤19

☐ 20-64

☐ 65+

Full Brother(s)

☐

☐ ≤19

☐ 20-64

☐ 65+

[Mark the youngest age that applies if more than one full brother or full sister has had diabetes.]

**ONLY MEN SHOULD COMPLETE QUESTION 30.**

30. Has a doctor ever told you that you have an enlarged prostate (also known as BPH or benign prostatic hyperplasia)?

☐ No

☐ Yes

→ Have you ever had surgery for this?

☐ Yes

☐ No

**ONLY WOMEN SHOULD COMPLETE QUESTIONS 31 TO 39.**

31. How old were you when you had your first menstrual period?



### 32. Have you ever been pregnant?

☐ Yes → How many times?

[Include ALL pregnancies, even those that did not result in a birth.]

 

☐ No → Go to question 37.

### 33. Did you develop diabetes or high blood sugar during any of your pregnancies?

☐ Yes ☐ No

### 34. How many of your pregnancies have resulted in a live birth?

 

pregnancies

### 35. If you ever gave birth, how old were you at the time you:

FIRST gave birth?

 

LAST gave birth?

 

### 36. How many months TOTAL (counting all of your pregnancies) did you breast feed?

 

Months

### 37. Did you ever have your tubes tied (a tubal ligation)?

☐ Yes → How old were you when you had your tubes tied?

☐ No

 

### 38. Have you been through menopause, or have your menstrual periods stopped for at least six months?

☐ Yes → How old were you when your NATURAL menstrual periods stopped?

☐ No

 

Which of the following is the reason your periods stopped?

- ☐ Natural menopause
- ☐ Radiation, chemotherapy, or medication
- ☐ Surgery that removed your uterus (womb) or ovaries
- ☐ Other reason

### 39. Have you had your uterus (womb) or any ovaries removed?

☐ Yes → Please mark ALL that were removed:

☐ No

☐ Uterus

 

At what age?

☐ One ovary

 

At what age?

☐ Two ovaries

 

At what age?

## M E D I C A T I O N U S E

### 40. In the past year, have you taken any of the following medications REGULARLY? By REGULARLY, we mean AT LEAST TWO TIMES PER WEEK FOR ONE MONTH OR MORE.

Low-dose aspirin, baby aspirin, or half-tablets of aspirin (to prevent heart disease or strokes)

No ☐ Yes ☐

How many years have you taken this type of medication REGULARLY? [If less than one year, enter 00.]

 

years

When you took this regularly, what is the average number of pills you took per week?

 

pills

Regular aspirin (such as Anacin, Bayer, Bufferin, Excedrin, etc.)

No ☐ Yes ☐

 

years

 

pills

Acetaminophen (such as Tylenol)

No ☐ Yes ☐

 

years

 

pills

The prescription drugs Celebrex, Vioxx, or Bextra

No ☐ Yes ☐

 

years

 

pills

Advil, Motrin, Aleve, Ibuprofen, or other over-the-counter pain relievers

No ☐ Yes ☐

 

years

 

pills

### 41. How many times have you filled a prescription for antibiotics for yourself in the past year?

 

times



42. Are you currently taking prescription medicine to lower your **blood pressure**?

- ☐ Yes  
☐ No

→ Please mark ALL that you take:

- |                                                    |                                                       |
|----------------------------------------------------|-------------------------------------------------------|
| <input type="checkbox"/> Accupril                  | <input type="checkbox"/> Diovan HCT                   |
| <input type="checkbox"/> Adalat or Procardia       | <input type="checkbox"/> Esidrix or Hydrodiuril (HCT) |
| <input type="checkbox"/> Aldactone                 | <input type="checkbox"/> Lasix                        |
| <input type="checkbox"/> Altace                    | <input type="checkbox"/> Lopressor or Toprol-XL       |
| <input type="checkbox"/> Calan, Isoptin or Verelan | <input type="checkbox"/> Lotrel                       |
| <input type="checkbox"/> Capoten                   | <input type="checkbox"/> Norvasc                      |
| <input type="checkbox"/> Cardizem or Tiazac        | <input type="checkbox"/> Prinivil or Zestril          |
| <input type="checkbox"/> Catapres                  | <input type="checkbox"/> Tenormin                     |
| <input type="checkbox"/> Cozaar                    |                                                       |
| <input type="checkbox"/> Diovan                    |                                                       |
| <input type="checkbox"/> Other (specify):          |                                                       |

43. Are you currently taking prescription medicine, including insulin, to lower your **blood sugar**?

- ☐ Yes  
☐ No

→ Please mark ALL that you take:

- |                                             |                                     |
|---------------------------------------------|-------------------------------------|
| <input type="checkbox"/> Insulin (any type) | <input type="checkbox"/> Glucophage |
| <input type="checkbox"/> Actos              | <input type="checkbox"/> Glucotrol  |
| <input type="checkbox"/> Amaryl             | <input type="checkbox"/> Glucovance |
| <input type="checkbox"/> Avandamet          | <input type="checkbox"/> Glyburide  |
| <input type="checkbox"/> Avandia            | <input type="checkbox"/> Metformin  |
| <input type="checkbox"/> Glipzide           |                                     |
| <input type="checkbox"/> Other (specify):   |                                     |

During the past three months, how often did you take your diabetes medication as instructed by your doctor?

- |                                           |                                 |
|-------------------------------------------|---------------------------------|
| <input type="checkbox"/> All the time     | <input type="checkbox"/> Rarely |
| <input type="checkbox"/> Most of the time | <input type="checkbox"/> Never  |
| <input type="checkbox"/> Sometimes        |                                 |

During the past three months, how often did you test your own blood sugar (not including at the doctor's office)?

- ☐ Less than once per week  
☐ 1-6 times per week  
☐ Once per day  
☐ Twice per day  
☐ Three times per day  
☐ Four or more times per day

44. Are you currently taking prescription medicine to lower your **cholesterol**?

- ☐ Yes  
☐ No

→ Please mark ALL that you take:

- ☐ Crestor  
☐ Gemfibrozil  
☐ Lescol  
☐ Lipitor  
☐ Lopid  
☐ Pravachol  
☐ Zetia  
☐ Zocor  
☐ Other (specify):

→ For how many years have you taken this medication? [Enter the longest number of years if you are currently taking more than one medicine.]

45. Are you currently taking any anti-depressant or anti-anxiety prescription medication?

- ☐ Yes  
☐ No

→ Please mark ALL that you take:

- |                                           |                                     |
|-------------------------------------------|-------------------------------------|
| <input type="checkbox"/> Ambien           | <input type="checkbox"/> Remeron    |
| <input type="checkbox"/> Buspar           | <input type="checkbox"/> Risperdal  |
| <input type="checkbox"/> Celexa           | <input type="checkbox"/> Seroquel   |
| <input type="checkbox"/> Dilantin         | <input type="checkbox"/> Topamax    |
| <input type="checkbox"/> Effexor          | <input type="checkbox"/> Wellbutrin |
| <input type="checkbox"/> Lexapro          | <input type="checkbox"/> Xanax      |
| <input type="checkbox"/> Paxil            | <input type="checkbox"/> Zoloft     |
| <input type="checkbox"/> Prozac           |                                     |
| <input type="checkbox"/> Other (specify): |                                     |

ONLY WOMEN SHOULD COMPLETE QUESTIONS 46 TO 49.

46. Have you EVER USED female hormone replacement therapy that contains estrogen and/or progesterone, for menopause? (this includes pills, patches, creams, and injections)

- ☐ Yes  
☐ No

→ Go to question 49.

47. Are you currently taking hormone replacement therapy?

- ☐ No

→ How many years ago did you LAST take hormone replacement therapy? [If less than one year ago, enter 00.]

- ☐ Yes

→ Please mark ALL that you take:

- |                                           |                                    |
|-------------------------------------------|------------------------------------|
| <input type="checkbox"/> Premarin         | <input type="checkbox"/> Vivelle   |
| <input type="checkbox"/> Prempro          | <input type="checkbox"/> Cenestin  |
| <input type="checkbox"/> Estrogen         | <input type="checkbox"/> Provera   |
| <input type="checkbox"/> Estradiol        | <input type="checkbox"/> Climara   |
| <input type="checkbox"/> Estracep         | <input type="checkbox"/> Activella |
| <input type="checkbox"/> Estratest        |                                    |
| <input type="checkbox"/> Prometrium       |                                    |
| <input type="checkbox"/> Other (specify): |                                    |

48. How old were you when you first started taking hormone replacement therapy?

49. Did you ever use birth control pills?

- ☐ Yes  
☐ No

→ How old were you when you first started using birth control pills?

→ For how many years have you used birth control pills, IN TOTAL? [If less than one year, enter 00.]



50. How many hours do you typically sleep in a 24-hour period?

On weekdays → 

|       |  |
|-------|--|
| Hours |  |
|-------|--|

On weekends → 

|       |  |
|-------|--|
| Hours |  |
|-------|--|

51. How much TIME PER DAY do you typically spend:

|                              | Hours                             | Minutes                           |                                                                                                              | Hours                             | Minutes                           |
|------------------------------|-----------------------------------|-----------------------------------|--------------------------------------------------------------------------------------------------------------|-----------------------------------|-----------------------------------|
| Sitting in a car or bus      | <div><div></div><div></div></div> | <div><div></div><div></div></div> | Using a computer at home (such as email, internet, games)                                                    | <div><div></div><div></div></div> | <div><div></div><div></div></div> |
| Sitting at work              | <div><div></div><div></div></div> | <div><div></div><div></div></div> | Other sitting activities (such as sitting at meals, talking on the phone, reading, playing cards, or sewing) | <div><div></div><div></div></div> | <div><div></div><div></div></div> |
| Watching TV or seeing movies | <div><div></div><div></div></div> | <div><div></div><div></div></div> |                                                                                                              |                                   |                                   |

52. How much TIME PER DAY do you typically spend:

|                                                                                                        |             |             |                                                                                           |             |             |
|--------------------------------------------------------------------------------------------------------|-------------|-------------|-------------------------------------------------------------------------------------------|-------------|-------------|
|                                                                                                        | Hours       | Minutes     |                                                                                           | Hours       | Minutes     |
| <b>Walking slowly</b> (such as moving around, walking at work, walking the dog, or for light exercise) | <div></div> | <div></div> | <b>Walking fast</b> (such as climbing stairs, walking fast to go places, or for exercise) | <div></div> | <div></div> |

53. How much TIME PER DAY do you typically spend doing:

| How much TIME PER DAY do you typically spend doing:                                                                              | On weekdays                       |                                   | On weekends                       |                                   |
|----------------------------------------------------------------------------------------------------------------------------------|-----------------------------------|-----------------------------------|-----------------------------------|-----------------------------------|
|                                                                                                                                  | Hours                             | Minutes                           | Hours                             | Minutes                           |
| Light work (such as standing at work, light office work, shopping, cooking, or child and elderly care)                           | <div><div></div><div></div></div> | <div><div></div><div></div></div> | <div><div></div><div></div></div> | <div><div></div><div></div></div> |
| Moderate Work (such as manufacturing work, shop work, cleaning house, gardening, mowing the lawn, or home repair)                | <div><div></div><div></div></div> | <div><div></div><div></div></div> | <div><div></div><div></div></div> | <div><div></div><div></div></div> |
| Strenuous Physical Work (such as moving furniture, loading or unloading trucks, construction work, farming, or other hard labor) | <div><div></div><div></div></div> | <div><div></div><div></div></div> | <div><div></div><div></div></div> | <div><div></div><div></div></div> |

54. How much TIME PER WEEK do you typically spend doing:

|                                                                         |             |             |                                                                                                                |             |             |
|-------------------------------------------------------------------------|-------------|-------------|----------------------------------------------------------------------------------------------------------------|-------------|-------------|
|                                                                         | Hours       | Minutes     |                                                                                                                | Hours       | Minutes     |
| <b>Moderate Sports</b> (such as bowling, dancing, golfing, or softball) | <div></div> | <div></div> | <b>Vigorous Sports</b> (such as jogging, aerobics, bicycling, tennis, swimming, weight lifting, or basketball) | <div></div> | <div></div> |

55. Thinking back to when you were IN YOUR THIRTIES, about how much TIME PER DAY did you typically spend doing:

|                                                                                                                          |  |             |             |                                                                                                                                         |  |             |             |
|--------------------------------------------------------------------------------------------------------------------------|--|-------------|-------------|-----------------------------------------------------------------------------------------------------------------------------------------|--|-------------|-------------|
|                                                                                                                          |  | Hours       | Minutes     |                                                                                                                                         |  | Hours       | Minutes     |
| <b>Light work</b> (such as standing at work, light office work, shopping, cooking, child and elderly care)               |  | <div></div> | <div></div> | <b>Strenuous Physical Work</b> (such as moving furniture, loading or unloading trucks, construction work, farming, or other hard labor) |  | <div></div> | <div></div> |
| <b>Moderate Work</b> (such as manufacturing work, shop work, cleaning house, gardening, mowing the lawn, or home repair) |  | <div></div> | <div></div> |                                                                                                                                         |  |             |             |

56. Thinking back to when you were IN YOUR THIRTIES, about how much TIME PER WEEK did you typically spend doing:

|                                                                         | Hours                | Minutes              |                                                                                                                | Hours                | Minutes              |
|-------------------------------------------------------------------------|----------------------|----------------------|----------------------------------------------------------------------------------------------------------------|----------------------|----------------------|
| <b>Moderate Sports</b> (such as bowling, dancing, golfing, or softball) | <input type="text"/> | <input type="text"/> | <b>Vigorous Sports</b> (such as jogging, aerobics, bicycling, tennis, swimming, weight lifting, or basketball) | <input type="text"/> | <input type="text"/> |

## EMOTIONAL WELL-BEING AND SUPPORT

57. This question asks about HOW YOU WERE FEELING DURING THE PAST WEEK.

Rarely or none of the time      Some of the time      Much of the time      Most or all of the time

- I was happy.
- I felt lonely.
- I could not get "going."
- I was bothered by things that usually don't bother me.
- I had trouble keeping my mind on what I was doing.
- I felt depressed.
- I felt that everything I did was an effort.
- I felt hopeful about the future.
- I felt fearful.
- My sleep was restless.

|                          |                          |                          |                          |
|--------------------------|--------------------------|--------------------------|--------------------------|
| <input type="checkbox"/> | <input type="checkbox"/> | <input type="checkbox"/> | <input type="checkbox"/> |
| <input type="checkbox"/> | <input type="checkbox"/> | <input type="checkbox"/> | <input type="checkbox"/> |
| <input type="checkbox"/> | <input type="checkbox"/> | <input type="checkbox"/> | <input type="checkbox"/> |
| <input type="checkbox"/> | <input type="checkbox"/> | <input type="checkbox"/> | <input type="checkbox"/> |
| <input type="checkbox"/> | <input type="checkbox"/> | <input type="checkbox"/> | <input type="checkbox"/> |
| <input type="checkbox"/> | <input type="checkbox"/> | <input type="checkbox"/> | <input type="checkbox"/> |
| <input type="checkbox"/> | <input type="checkbox"/> | <input type="checkbox"/> | <input type="checkbox"/> |
| <input type="checkbox"/> | <input type="checkbox"/> | <input type="checkbox"/> | <input type="checkbox"/> |
| <input type="checkbox"/> | <input type="checkbox"/> | <input type="checkbox"/> | <input type="checkbox"/> |
| <input type="checkbox"/> | <input type="checkbox"/> | <input type="checkbox"/> | <input type="checkbox"/> |

58. In the PAST MONTH, how often have you felt that:

Rarely or none of the time      Some of the time      Much of the time      Most or all of the time

- you were unable to control the important things in your life?
- difficulties were piling up so high that you could not overcome them?

|                          |                          |                          |                          |
|--------------------------|--------------------------|--------------------------|--------------------------|
| <input type="checkbox"/> | <input type="checkbox"/> | <input type="checkbox"/> | <input type="checkbox"/> |
| <input type="checkbox"/> | <input type="checkbox"/> | <input type="checkbox"/> | <input type="checkbox"/> |

59. How many close friends or relatives would help you with your emotional problems or feelings if you needed it?

60. How many people could you ask for help in an emergency or with lending you money?

## RELIGION AND SPIRITUALITY

61. How often do you attend religious or faith services during the year?

- ☐ Never
- ☐ On major holy days or holidays only
- ☐ More than 4 times per year, but not every week
- ☐ Once per week
- ☐ More than once per week

62. How spiritual or religious do you consider yourself to be:

- ☐ Very
- ☐ Fairly
- ☐ Slightly
- ☐ Not at all

63. How much is religion, faith, or God a source of strength and comfort to you?

- ☐ Not very much
- ☐ Somewhat
- ☐ Quite a bit
- ☐ A great deal



# HEALTH INSURANCE AND USE OF MEDICAL SERVICES

64. Are you covered by any type of health insurance, including private insurance, Medicare or Medicaid?

- ☐ Yes  
☐ No

Which type?:  
(Mark all that apply)

- ☐ Medicaid or medical assistance  
☐ Medicare  
☐ Private insurance or employer insurance (for example, insurance through your job, like Blue Cross or another private insurance company)  
☐ CHAMPUS/Tricare/CHAMPVA/V.A./military  
☐ Other type of health insurance

65. When was your *last* visit to a doctor or other medical person? This could be for a routine check-up, because you were sick, or simply to get health advice.

years ago

OR

months ago

66. When was your *last* visit to a dentist?

years ago

OR

months ago

67. Did you visit an "alternative medicine" (or "complementary medicine") practitioner during the past year? (such as a chiropractor, massage therapist, herbalist, acupuncturist, traditional healer, etc.)

- ☐ Yes ☐ No

## CANCER SCREENING EXAMS

68. If you are a woman, in the past year, how many times did you practice BREAST SELF-EXAMINATION (feeling your own breasts for lumps)?

 times

69. Have you ever had a:

### WOMEN

Pap smear? (test for cervical cancer)

- ☐ Yes  
☐ No

When was your last Pap Smear?

years ago

[If less than one year ago, enter 00.]

Mammogram? (x-ray to check for breast cancer)

- ☐ Yes  
☐ No

When was your last Mammogram?

years ago

[If less than one year ago, enter 00.]

Sigmoidoscopy? (short tube inserted into rectum while you are awake and unsedated to check for colon or rectal cancer)

- ☐ Yes  
☐ No

When was your last Sigmoidoscopy?

years ago

[If less than one year ago, enter 00.]

Colonoscopy? (long tube inserted into rectum after you are sedated or put to sleep to check for colon or rectal cancer)

- ☐ Yes  
☐ No

When was your last Colonoscopy?

years ago

[If less than one year ago, enter 00.]

# MEN

**Digital Rectal Exam?** (doctor's finger inserted into your rectum to feel for prostate cancer)

- ☐ Yes  
☐ No

→ **When was your last Digital Rectal Exam?**

years ago

 

[If less than one year ago, enter 00.]

**Sigmoidoscopy?** (short tube inserted into rectum while you are awake and unsedated to check for colon or rectal cancer)

- ☐ Yes  
☐ No

→ **When was your last Sigmoidoscopy?**

years ago

 

[If less than one year ago, enter 00.]

**PSA blood test?** (blood test to check for prostate cancer)

- ☐ Yes  
☐ No

→ **When was your last PSA blood test?**

years ago

 

[If less than one year ago, enter 00.]

**Colonoscopy?** (long tube inserted into rectum after you are sedated or put to sleep to check for colon or rectal cancer)

- ☐ Yes  
☐ No

→ **When was your last Colonoscopy?**

years ago

 

[If less than one year ago, enter 00.]

**70. If you have NEVER had any of the following tests, or if you had any of the following tests MORE THAN 5 YEARS AGO, please mark any of the following reasons why you have not had this test recently. Mark as many reasons as apply.**

WOMEN ANSWER THESE

MEN ANSWER THESE

**Reasons you have not had this test recently:**

Your doctor has not recommended this test

You forgot to do it

The fear of finding cancer

You put it off or you're too busy

The embarrassment

The cost

The pain or discomfort that you may experience during this test

None of these reasons apply

Mammogram

Pap smear

Colonoscopy/  
Sigmoidoscopy

Digital rectal exam

PSA blood test

☐
☐
☐
☐
☐
☐
☐
☐
☐
☐
☐
☐
☐
☐
☐
☐
☐
☐
☐
☐
☐
☐
☐
☐
☐
☐
☐
☐
☐
☐
☐
☐
☐
☐
☐
☐
☐
☐
☐
☐

## ENVIRONMENT IN AND AROUND YOUR HOME

**71. How many years have you lived in your current home?**

 

years

[If less than one year, enter 00.]

**72. How would you describe the outdoor air quality around your home?**

- ☐ Poor  
☐ Fair  
☐ Good  
☐ Excellent

**73. How would you describe the indoor air quality in your home?**

- ☐ Poor  
☐ Fair  
☐ Good  
☐ Excellent



74. How many hours per week do you spend talking on a cellular phone?

 

hours [If less than one hour, enter 00.]

SEAT BELT USE

75. When you are in a vehicle, are you more likely to drive or ride?

☐ Drive

☐ Ride

76. How often do you use seat belts

- ☐ All of the time
- ☐ Most of the time
- ☐ Some of the time
- ☐ None of the time

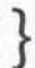

What are the reasons you do not always use seat belts?  
(Mark ALL that apply)

- ☐ Seatbelts are hard to fasten
- ☐ Seatbelts wrinkle your clothes
- ☐ Seatbelts restrict your movement
- ☐ Seat belts are uncomfortable
- ☐ You forget to put them on
- ☐ If you have an accident, you will not be able to get out
- ☐ You're only going a short distance
- ☐ You're in a rush
- ☐ None of these reasons apply

WORK HISTORY

77. What type of job did you have for the **LONGEST PERIOD OF TIME DURING YOUR ADULT LIFE?**

(Mark only one.)

- ☐ Laborer, including construction worker
- ☐ Farmer or farm worker
- ☐ Professional/Technician
- ☐ Supervisory position (Manager/Administrator)
- ☐ Sales worker
- ☐ Small business owner
- ☐ Clerical worker
- ☐ Personal service worker
- ☐ Craftsperson
- ☐ Factory worker or machine operator
- ☐ Transportation worker or driver
- ☐ Food preparation or service worker
- ☐ Protective service worker
- ☐ Community/social services worker
- ☐ Educator/Trainer/Librarian
- ☐ Maintenance and repair worker
- ☐ Military officer or enlisted person
- ☐ Housewife
- ☐ I have never worked
- ☐ Some other type of job

78. Are you currently working?

☐ Yes

☐ No

(If yes, which of the following job types do you currently have?)

(Mark only one.)

- ☐ Laborer, including construction worker
- ☐ Farmer or farm worker
- ☐ Professional/Technician
- ☐ Supervisory position (Manager/Administrator)
- ☐ Sales worker
- ☐ Small business owner
- ☐ Clerical worker
- ☐ Personal service worker
- ☐ Craftsperson
- ☐ Factory worker or machine operator
- ☐ Transportation worker or driver
- ☐ Food preparation or service worker
- ☐ Protective service worker
- ☐ Community/social services worker
- ☐ Educator/Trainer/Librarian
- ☐ Maintenance and repair worker
- ☐ Military officer or enlisted person
- ☐ Housewife
- ☐ Some other type of job

79. Please mark any of the following industries or occupations in which you were employed FOR 10 YEARS OR LONGER. (Mark ALL that apply.)

- |                                                              |                                                                                    |
|--------------------------------------------------------------|------------------------------------------------------------------------------------|
| <input type="checkbox"/> Automotive repair                   | <input type="checkbox"/> Mining, quarrying, rock crushing, or cement manufacturing |
| <input type="checkbox"/> Chemical production or use          | <input type="checkbox"/> Nursing                                                   |
| <input type="checkbox"/> Construction                        | <input type="checkbox"/> Paint production or use                                   |
| <input type="checkbox"/> Cotton, wool, or textile processing | <input type="checkbox"/> Paper or pulp mill work                                   |
| <input type="checkbox"/> Dry cleaning                        | <input type="checkbox"/> Pesticide production or use                               |
| <input type="checkbox"/> Farming                             | <input type="checkbox"/> Plastic production or processing                          |
| <input type="checkbox"/> Furniture making or woodworking     | <input type="checkbox"/> Rubber or tire manufacturing                              |
| <input type="checkbox"/> Gasoline refining or redistribution | <input type="checkbox"/> Shipyard work                                             |
| <input type="checkbox"/> Hairdressing                        | <input type="checkbox"/> None of these                                             |
| <input type="checkbox"/> Metal production or processing      |                                                                                    |
| <input type="checkbox"/> Military                            |                                                                                    |

YOUR USUAL EATING HABITS

80. Thinking about your usual eating habits OVER THE PAST YEAR, HOW MANY TIMES PER DAY did you typically eat (or drink):

|                                                                | Number of times per day [If less than once per day, enter 00.] |                                                  | Number of times per day [If less than once per day, enter 00.] |
|----------------------------------------------------------------|----------------------------------------------------------------|--------------------------------------------------|----------------------------------------------------------------|
| Meat, sandwiches made with meat, meat in mixed dishes, or eggs | ▶ <input type="text"/> <input type="text"/>                    | Vegetables                                       | ▶ <input type="text"/> <input type="text"/>                    |
| Breads, cereals, rice, potatoes, or pastas                     | ▶ <input type="text"/> <input type="text"/>                    | Fruits or fruit juices                           | ▶ <input type="text"/> <input type="text"/>                    |
| Desserts, candy, cookies, sweets, or salty snacks              | ▶ <input type="text"/> <input type="text"/>                    | Soft drinks, Kool-Aid, or other sweetened drinks | ▶ <input type="text"/> <input type="text"/>                    |
| Milk, cheese, ice cream, yogurt, or other dairy products       | ▶ <input type="text"/> <input type="text"/>                    | Water                                            | ▶ <input type="text"/> <input type="text"/>                    |

81. The next questions ask about your USUAL EATING HABITS DURING THE PAST YEAR. For each food item, mark the box to show how often you usually ate that item. Please mark only one answer per food item.

**REMEMBER**

If you never ate a certain food, mark the "Never" column, don't leave it blank!

For example, if you normally ate eggs for breakfast on Saturdays and Sundays, you would mark the box for "2-3 times a week" as shown at right:

| Food Items                                     | Average use over the past year |                          |                          |                          |                          |                                     |                          |                          |
|------------------------------------------------|--------------------------------|--------------------------|--------------------------|--------------------------|--------------------------|-------------------------------------|--------------------------|--------------------------|
|                                                | Never                          | Rarely                   | 1/month                  | 2-3/month                | 1/week                   | 2-3/week                            | 4-6/week                 | 1/day                    |
| Eggs such as fried, scrambled, boiled, omelets | <input type="checkbox"/>       | <input type="checkbox"/> | <input type="checkbox"/> | <input type="checkbox"/> | <input type="checkbox"/> | <input checked="" type="checkbox"/> | <input type="checkbox"/> | <input type="checkbox"/> |



| Food Items                                                                          | Average use over the past year |                          |                          |                          |                          |                          |                          |                          |                          |
|-------------------------------------------------------------------------------------|--------------------------------|--------------------------|--------------------------|--------------------------|--------------------------|--------------------------|--------------------------|--------------------------|--------------------------|
|                                                                                     | Never                          | Rarely                   | 1/month                  | 2-3/month                | 1/week                   | 2-3/week                 | 4-6/week                 | 1/day                    | 2+/day                   |
| <b>Fruits and Fruit Juices</b>                                                      |                                |                          |                          |                          |                          |                          |                          |                          |                          |
| Bananas                                                                             | <input type="checkbox"/>       | <input type="checkbox"/> | <input type="checkbox"/> | <input type="checkbox"/> | <input type="checkbox"/> | <input type="checkbox"/> | <input type="checkbox"/> | <input type="checkbox"/> | <input type="checkbox"/> |
| Apples, pears, or apple sauce                                                       | <input type="checkbox"/>       | <input type="checkbox"/> | <input type="checkbox"/> | <input type="checkbox"/> | <input type="checkbox"/> | <input type="checkbox"/> | <input type="checkbox"/> | <input type="checkbox"/> | <input type="checkbox"/> |
| Watermelon, cantaloupe, or honeydew                                                 | <input type="checkbox"/>       | <input type="checkbox"/> | <input type="checkbox"/> | <input type="checkbox"/> | <input type="checkbox"/> | <input type="checkbox"/> | <input type="checkbox"/> | <input type="checkbox"/> | <input type="checkbox"/> |
| Grapes, strawberries, blueberries, raspberries, or blackberries                     | <input type="checkbox"/>       | <input type="checkbox"/> | <input type="checkbox"/> | <input type="checkbox"/> | <input type="checkbox"/> | <input type="checkbox"/> | <input type="checkbox"/> | <input type="checkbox"/> | <input type="checkbox"/> |
| Oranges or grapefruit (not including juice)                                         | <input type="checkbox"/>       | <input type="checkbox"/> | <input type="checkbox"/> | <input type="checkbox"/> | <input type="checkbox"/> | <input type="checkbox"/> | <input type="checkbox"/> | <input type="checkbox"/> | <input type="checkbox"/> |
| Peaches or nectarines                                                               | <input type="checkbox"/>       | <input type="checkbox"/> | <input type="checkbox"/> | <input type="checkbox"/> | <input type="checkbox"/> | <input type="checkbox"/> | <input type="checkbox"/> | <input type="checkbox"/> | <input type="checkbox"/> |
| Other fruits such as pineapple, mixed fruit, fruit salad, raisins, plums, or prunes | <input type="checkbox"/>       | <input type="checkbox"/> | <input type="checkbox"/> | <input type="checkbox"/> | <input type="checkbox"/> | <input type="checkbox"/> | <input type="checkbox"/> | <input type="checkbox"/> | <input type="checkbox"/> |
| 100% orange juice or grapefruit juice (fresh, frozen, or canned)                    | <input type="checkbox"/>       | <input type="checkbox"/> | <input type="checkbox"/> | <input type="checkbox"/> | <input type="checkbox"/> | <input type="checkbox"/> | <input type="checkbox"/> | <input type="checkbox"/> | <input type="checkbox"/> |
| 100% fruit juice such as apple, grape, etc.                                         | <input type="checkbox"/>       | <input type="checkbox"/> | <input type="checkbox"/> | <input type="checkbox"/> | <input type="checkbox"/> | <input type="checkbox"/> | <input type="checkbox"/> | <input type="checkbox"/> | <input type="checkbox"/> |
| Fruit flavored drinks such as Kool-Aid, punch, Tang, lemonade, or Sunny Delight     | <input type="checkbox"/>       | <input type="checkbox"/> | <input type="checkbox"/> | <input type="checkbox"/> | <input type="checkbox"/> | <input type="checkbox"/> | <input type="checkbox"/> | <input type="checkbox"/> | <input type="checkbox"/> |
| <b>Breakfast Foods</b>                                                              |                                |                          |                          |                          |                          |                          |                          |                          |                          |
| Bran or high fiber cereals such as All Bran, Raisin Bran, or Shredded Wheat         | <input type="checkbox"/>       | <input type="checkbox"/> | <input type="checkbox"/> | <input type="checkbox"/> | <input type="checkbox"/> | <input type="checkbox"/> | <input type="checkbox"/> | <input type="checkbox"/> | <input type="checkbox"/> |
| Other cold cereals such as Corn Flakes, Cheerios, or Product 19                     | <input type="checkbox"/>       | <input type="checkbox"/> | <input type="checkbox"/> | <input type="checkbox"/> | <input type="checkbox"/> | <input type="checkbox"/> | <input type="checkbox"/> | <input type="checkbox"/> | <input type="checkbox"/> |
| Grits                                                                               | <input type="checkbox"/>       | <input type="checkbox"/> | <input type="checkbox"/> | <input type="checkbox"/> | <input type="checkbox"/> | <input type="checkbox"/> | <input type="checkbox"/> | <input type="checkbox"/> | <input type="checkbox"/> |
| Oatmeal, cream of wheat, or other hot cereals                                       | <input type="checkbox"/>       | <input type="checkbox"/> | <input type="checkbox"/> | <input type="checkbox"/> | <input type="checkbox"/> | <input type="checkbox"/> | <input type="checkbox"/> | <input type="checkbox"/> | <input type="checkbox"/> |
| Eggs such as fried, scrambled, hard boiled or omelets                               | <input type="checkbox"/>       | <input type="checkbox"/> | <input type="checkbox"/> | <input type="checkbox"/> | <input type="checkbox"/> | <input type="checkbox"/> | <input type="checkbox"/> | <input type="checkbox"/> | <input type="checkbox"/> |
| Bacon or breakfast sausage (include breakfast sandwiches)                           | <input type="checkbox"/>       | <input type="checkbox"/> | <input type="checkbox"/> | <input type="checkbox"/> | <input type="checkbox"/> | <input type="checkbox"/> | <input type="checkbox"/> | <input type="checkbox"/> | <input type="checkbox"/> |
| Biscuits                                                                            | <input type="checkbox"/>       | <input type="checkbox"/> | <input type="checkbox"/> | <input type="checkbox"/> | <input type="checkbox"/> | <input type="checkbox"/> | <input type="checkbox"/> | <input type="checkbox"/> | <input type="checkbox"/> |
| <b>Vegetables</b>                                                                   |                                |                          |                          |                          |                          |                          |                          |                          |                          |
| Broccoli, cabbage, brussels sprouts, or cauliflower                                 | <input type="checkbox"/>       | <input type="checkbox"/> | <input type="checkbox"/> | <input type="checkbox"/> | <input type="checkbox"/> | <input type="checkbox"/> | <input type="checkbox"/> | <input type="checkbox"/> | <input type="checkbox"/> |
| Mustard greens, turnip greens, collards, or spinach                                 | <input type="checkbox"/>       | <input type="checkbox"/> | <input type="checkbox"/> | <input type="checkbox"/> | <input type="checkbox"/> | <input type="checkbox"/> | <input type="checkbox"/> | <input type="checkbox"/> | <input type="checkbox"/> |
| Tomatoes (fresh or canned) and tomato or vegetable juice                            | <input type="checkbox"/>       | <input type="checkbox"/> | <input type="checkbox"/> | <input type="checkbox"/> | <input type="checkbox"/> | <input type="checkbox"/> | <input type="checkbox"/> | <input type="checkbox"/> | <input type="checkbox"/> |
| Onions                                                                              | <input type="checkbox"/>       | <input type="checkbox"/> | <input type="checkbox"/> | <input type="checkbox"/> | <input type="checkbox"/> | <input type="checkbox"/> | <input type="checkbox"/> | <input type="checkbox"/> | <input type="checkbox"/> |
| Carrots or mixed vegetables with carrots (raw or cooked)                            | <input type="checkbox"/>       | <input type="checkbox"/> | <input type="checkbox"/> | <input type="checkbox"/> | <input type="checkbox"/> | <input type="checkbox"/> | <input type="checkbox"/> | <input type="checkbox"/> | <input type="checkbox"/> |
| Corn (fresh, canned, or frozen)                                                     | <input type="checkbox"/>       | <input type="checkbox"/> | <input type="checkbox"/> | <input type="checkbox"/> | <input type="checkbox"/> | <input type="checkbox"/> | <input type="checkbox"/> | <input type="checkbox"/> | <input type="checkbox"/> |

| Food Items                                                                                | Average use over the past year |                          |                          |                          |                          |                          |                          |                          |                          |
|-------------------------------------------------------------------------------------------|--------------------------------|--------------------------|--------------------------|--------------------------|--------------------------|--------------------------|--------------------------|--------------------------|--------------------------|
|                                                                                           | Never                          | Rarely                   | 1/month                  | 2-3/month                | 1/week                   | 2-3/week                 | 4-6/week                 | 1/day                    | 2+/day                   |
| <b>Vegetables</b>                                                                         |                                |                          |                          |                          |                          |                          |                          |                          |                          |
| Green beans or green peas (fresh, canned, or frozen)                                      | <input type="checkbox"/>       | <input type="checkbox"/> | <input type="checkbox"/> | <input type="checkbox"/> | <input type="checkbox"/> | <input type="checkbox"/> | <input type="checkbox"/> | <input type="checkbox"/> | <input type="checkbox"/> |
| Lettuce, green salad, or tossed salad with lettuce                                        | <input type="checkbox"/>       | <input type="checkbox"/> | <input type="checkbox"/> | <input type="checkbox"/> | <input type="checkbox"/> | <input type="checkbox"/> | <input type="checkbox"/> | <input type="checkbox"/> | <input type="checkbox"/> |
| Coleslaw or sauerkraut                                                                    | <input type="checkbox"/>       | <input type="checkbox"/> | <input type="checkbox"/> | <input type="checkbox"/> | <input type="checkbox"/> | <input type="checkbox"/> | <input type="checkbox"/> | <input type="checkbox"/> | <input type="checkbox"/> |
| Other vegetables such as eggplant, mushrooms, celery, cucumber, squash, or okra           | <input type="checkbox"/>       | <input type="checkbox"/> | <input type="checkbox"/> | <input type="checkbox"/> | <input type="checkbox"/> | <input type="checkbox"/> | <input type="checkbox"/> | <input type="checkbox"/> | <input type="checkbox"/> |
| <b>Rice, Beans and Potatoes</b>                                                           |                                |                          |                          |                          |                          |                          |                          |                          |                          |
| Rice mixed with meat or seafood (such as dirty rice or jambalaya)                         | <input type="checkbox"/>       | <input type="checkbox"/> | <input type="checkbox"/> | <input type="checkbox"/> | <input type="checkbox"/> | <input type="checkbox"/> | <input type="checkbox"/> | <input type="checkbox"/> | <input type="checkbox"/> |
| Plain rice or rice mixed with vegetables or beans (include white or brown rice)           | <input type="checkbox"/>       | <input type="checkbox"/> | <input type="checkbox"/> | <input type="checkbox"/> | <input type="checkbox"/> | <input type="checkbox"/> | <input type="checkbox"/> | <input type="checkbox"/> | <input type="checkbox"/> |
| Pork and beans, baked beans, or chili with beans                                          | <input type="checkbox"/>       | <input type="checkbox"/> | <input type="checkbox"/> | <input type="checkbox"/> | <input type="checkbox"/> | <input type="checkbox"/> | <input type="checkbox"/> | <input type="checkbox"/> | <input type="checkbox"/> |
| Other dried and canned beans such as pinto, white, kidney, black eyed peas, or field peas | <input type="checkbox"/>       | <input type="checkbox"/> | <input type="checkbox"/> | <input type="checkbox"/> | <input type="checkbox"/> | <input type="checkbox"/> | <input type="checkbox"/> | <input type="checkbox"/> | <input type="checkbox"/> |
| Sweet potatoes or yams                                                                    | <input type="checkbox"/>       | <input type="checkbox"/> | <input type="checkbox"/> | <input type="checkbox"/> | <input type="checkbox"/> | <input type="checkbox"/> | <input type="checkbox"/> | <input type="checkbox"/> | <input type="checkbox"/> |
| Fried potatoes (such as french fries, home fries, hash browns, or tater tots)             | <input type="checkbox"/>       | <input type="checkbox"/> | <input type="checkbox"/> | <input type="checkbox"/> | <input type="checkbox"/> | <input type="checkbox"/> | <input type="checkbox"/> | <input type="checkbox"/> | <input type="checkbox"/> |
| Mashed, scalloped, baked, or boiled potatoes                                              | <input type="checkbox"/>       | <input type="checkbox"/> | <input type="checkbox"/> | <input type="checkbox"/> | <input type="checkbox"/> | <input type="checkbox"/> | <input type="checkbox"/> | <input type="checkbox"/> | <input type="checkbox"/> |
| <b>Pasta, Pizza and Soup</b>                                                              |                                |                          |                          |                          |                          |                          |                          |                          |                          |
| Spaghetti, ravioli, lasagna, or other pasta with tomato or meat sauce                     | <input type="checkbox"/>       | <input type="checkbox"/> | <input type="checkbox"/> | <input type="checkbox"/> | <input type="checkbox"/> | <input type="checkbox"/> | <input type="checkbox"/> | <input type="checkbox"/> | <input type="checkbox"/> |
| Macaroni and cheese                                                                       | <input type="checkbox"/>       | <input type="checkbox"/> | <input type="checkbox"/> | <input type="checkbox"/> | <input type="checkbox"/> | <input type="checkbox"/> | <input type="checkbox"/> | <input type="checkbox"/> | <input type="checkbox"/> |
| Pizza (home made, frozen, or from a restaurant)                                           | <input type="checkbox"/>       | <input type="checkbox"/> | <input type="checkbox"/> | <input type="checkbox"/> | <input type="checkbox"/> | <input type="checkbox"/> | <input type="checkbox"/> | <input type="checkbox"/> | <input type="checkbox"/> |
| Soups or chowders (such as tomato, vegetable, noodle, rice, etc.)                         | <input type="checkbox"/>       | <input type="checkbox"/> | <input type="checkbox"/> | <input type="checkbox"/> | <input type="checkbox"/> | <input type="checkbox"/> | <input type="checkbox"/> | <input type="checkbox"/> | <input type="checkbox"/> |
| <b>Meat</b>                                                                               |                                |                          |                          |                          |                          |                          |                          |                          |                          |
| Fried beef (include chicken fried steak and steak with gravy)                             | <input type="checkbox"/>       | <input type="checkbox"/> | <input type="checkbox"/> | <input type="checkbox"/> | <input type="checkbox"/> | <input type="checkbox"/> | <input type="checkbox"/> | <input type="checkbox"/> | <input type="checkbox"/> |
| Hamburgers, cheeseburgers, or sloppy joes                                                 | <input type="checkbox"/>       | <input type="checkbox"/> | <input type="checkbox"/> | <input type="checkbox"/> | <input type="checkbox"/> | <input type="checkbox"/> | <input type="checkbox"/> | <input type="checkbox"/> | <input type="checkbox"/> |
| Other ground beef such as meatloaf, meatballs, or patties                                 | <input type="checkbox"/>       | <input type="checkbox"/> | <input type="checkbox"/> | <input type="checkbox"/> | <input type="checkbox"/> | <input type="checkbox"/> | <input type="checkbox"/> | <input type="checkbox"/> | <input type="checkbox"/> |
| Beef in mixed dishes such as stew, pot pies, casserole, or stirfry                        | <input type="checkbox"/>       | <input type="checkbox"/> | <input type="checkbox"/> | <input type="checkbox"/> | <input type="checkbox"/> | <input type="checkbox"/> | <input type="checkbox"/> | <input type="checkbox"/> | <input type="checkbox"/> |
| Roast beef, steak, or beef barbeque (include frozen dinners and sandwiches)               | <input type="checkbox"/>       | <input type="checkbox"/> | <input type="checkbox"/> | <input type="checkbox"/> | <input type="checkbox"/> | <input type="checkbox"/> | <input type="checkbox"/> | <input type="checkbox"/> | <input type="checkbox"/> |
| Liver, kidneys, chitterlings, ham hocks, pigs feet, or other organ meats                  | <input type="checkbox"/>       | <input type="checkbox"/> | <input type="checkbox"/> | <input type="checkbox"/> | <input type="checkbox"/> | <input type="checkbox"/> | <input type="checkbox"/> | <input type="checkbox"/> | <input type="checkbox"/> |



| Food Items            |                                                                                                          | Average use over the past year |                          |                          |                          |                          |                          |                          |                          |                          |
|-----------------------|----------------------------------------------------------------------------------------------------------|--------------------------------|--------------------------|--------------------------|--------------------------|--------------------------|--------------------------|--------------------------|--------------------------|--------------------------|
|                       |                                                                                                          | Never                          | Rarely                   | 1/month                  | 2-3/month                | 1/week                   | 2-3/week                 | 4-6/week                 | 1/day                    | 2+/day                   |
| Meat                  | Fried chicken or chicken nuggets                                                                         | <input type="checkbox"/>       | <input type="checkbox"/> | <input type="checkbox"/> | <input type="checkbox"/> | <input type="checkbox"/> | <input type="checkbox"/> | <input type="checkbox"/> | <input type="checkbox"/> | <input type="checkbox"/> |
|                       | Baked, broiled, or boiled chicken or turkey (including frozen dinners and sandwiches)                    | <input type="checkbox"/>       | <input type="checkbox"/> | <input type="checkbox"/> | <input type="checkbox"/> | <input type="checkbox"/> | <input type="checkbox"/> | <input type="checkbox"/> | <input type="checkbox"/> | <input type="checkbox"/> |
|                       | Chicken in mixed dishes, casserole, stir-fries, or chicken pot pie                                       | <input type="checkbox"/>       | <input type="checkbox"/> | <input type="checkbox"/> | <input type="checkbox"/> | <input type="checkbox"/> | <input type="checkbox"/> | <input type="checkbox"/> | <input type="checkbox"/> | <input type="checkbox"/> |
|                       | Roast pork, pork chops, dinner ham, pork spareribs, or pork barbeque                                     | <input type="checkbox"/>       | <input type="checkbox"/> | <input type="checkbox"/> | <input type="checkbox"/> | <input type="checkbox"/> | <input type="checkbox"/> | <input type="checkbox"/> | <input type="checkbox"/> | <input type="checkbox"/> |
|                       | Canned tuna fish, tuna casserole, or tuna salad (including sandwiches)                                   | <input type="checkbox"/>       | <input type="checkbox"/> | <input type="checkbox"/> | <input type="checkbox"/> | <input type="checkbox"/> | <input type="checkbox"/> | <input type="checkbox"/> | <input type="checkbox"/> | <input type="checkbox"/> |
|                       | Fried fish, shrimp, or seafood (including sandwiches)                                                    | <input type="checkbox"/>       | <input type="checkbox"/> | <input type="checkbox"/> | <input type="checkbox"/> | <input type="checkbox"/> | <input type="checkbox"/> | <input type="checkbox"/> | <input type="checkbox"/> | <input type="checkbox"/> |
|                       | Broiled or baked fish, shrimp, or seafood (including sandwiches)                                         | <input type="checkbox"/>       | <input type="checkbox"/> | <input type="checkbox"/> | <input type="checkbox"/> | <input type="checkbox"/> | <input type="checkbox"/> | <input type="checkbox"/> | <input type="checkbox"/> | <input type="checkbox"/> |
|                       | Bologna, salami, or other lunch meats                                                                    | <input type="checkbox"/>       | <input type="checkbox"/> | <input type="checkbox"/> | <input type="checkbox"/> | <input type="checkbox"/> | <input type="checkbox"/> | <input type="checkbox"/> | <input type="checkbox"/> | <input type="checkbox"/> |
|                       | Hot dogs or sausage (such as Kielbasa, Italian, Polish, Vienna, etc.) (do not include breakfast sausage) | <input type="checkbox"/>       | <input type="checkbox"/> | <input type="checkbox"/> | <input type="checkbox"/> | <input type="checkbox"/> | <input type="checkbox"/> | <input type="checkbox"/> | <input type="checkbox"/> | <input type="checkbox"/> |
|                       | Meat substitutes such as veggie-burgers, soy products, or tofu                                           | <input type="checkbox"/>       | <input type="checkbox"/> | <input type="checkbox"/> | <input type="checkbox"/> | <input type="checkbox"/> | <input type="checkbox"/> | <input type="checkbox"/> | <input type="checkbox"/> | <input type="checkbox"/> |
| Breads                | White bread, rolls, dinner rolls, buns, or bagels (include sandwiches)                                   | <input type="checkbox"/>       | <input type="checkbox"/> | <input type="checkbox"/> | <input type="checkbox"/> | <input type="checkbox"/> | <input type="checkbox"/> | <input type="checkbox"/> | <input type="checkbox"/> | <input type="checkbox"/> |
|                       | Dark or whole grain breads (include sandwiches)                                                          | <input type="checkbox"/>       | <input type="checkbox"/> | <input type="checkbox"/> | <input type="checkbox"/> | <input type="checkbox"/> | <input type="checkbox"/> | <input type="checkbox"/> | <input type="checkbox"/> | <input type="checkbox"/> |
|                       | Corn bread, corn muffins, corn tortillas, or hush puppies                                                | <input type="checkbox"/>       | <input type="checkbox"/> | <input type="checkbox"/> | <input type="checkbox"/> | <input type="checkbox"/> | <input type="checkbox"/> | <input type="checkbox"/> | <input type="checkbox"/> | <input type="checkbox"/> |
| Spreads and Dressings | Butter (real butter, not margarine, added to foods such as bread, grits, rice, and vegetables)           | <input type="checkbox"/>       | <input type="checkbox"/> | <input type="checkbox"/> | <input type="checkbox"/> | <input type="checkbox"/> | <input type="checkbox"/> | <input type="checkbox"/> | <input type="checkbox"/> | <input type="checkbox"/> |
|                       | Margarine (added to foods such as breads, grits, rice, and vegetables)                                   | <input type="checkbox"/>       | <input type="checkbox"/> | <input type="checkbox"/> | <input type="checkbox"/> | <input type="checkbox"/> | <input type="checkbox"/> | <input type="checkbox"/> | <input type="checkbox"/> | <input type="checkbox"/> |
|                       | Regular salad dressing or mayonnaise (added to salads or sandwiches)                                     | <input type="checkbox"/>       | <input type="checkbox"/> | <input type="checkbox"/> | <input type="checkbox"/> | <input type="checkbox"/> | <input type="checkbox"/> | <input type="checkbox"/> | <input type="checkbox"/> | <input type="checkbox"/> |
|                       | Low fat or reduced fat salad dressing or mayonnaise (added to salads or sandwiches)                      | <input type="checkbox"/>       | <input type="checkbox"/> | <input type="checkbox"/> | <input type="checkbox"/> | <input type="checkbox"/> | <input type="checkbox"/> | <input type="checkbox"/> | <input type="checkbox"/> | <input type="checkbox"/> |
|                       | Jelly, jam, preserves, honey, or syrup                                                                   | <input type="checkbox"/>       | <input type="checkbox"/> | <input type="checkbox"/> | <input type="checkbox"/> | <input type="checkbox"/> | <input type="checkbox"/> | <input type="checkbox"/> | <input type="checkbox"/> | <input type="checkbox"/> |
|                       | Peanut butter (include sandwiches)                                                                       | <input type="checkbox"/>       | <input type="checkbox"/> | <input type="checkbox"/> | <input type="checkbox"/> | <input type="checkbox"/> | <input type="checkbox"/> | <input type="checkbox"/> | <input type="checkbox"/> | <input type="checkbox"/> |
| Dairy Foods           | Skim milk or buttermilk (include milk on cereal and added to coffee or tea)                              | <input type="checkbox"/>       | <input type="checkbox"/> | <input type="checkbox"/> | <input type="checkbox"/> | <input type="checkbox"/> | <input type="checkbox"/> | <input type="checkbox"/> | <input type="checkbox"/> | <input type="checkbox"/> |
|                       | 1% or 2% lowfat milk (include milk on cereal and added to coffee or tea)                                 | <input type="checkbox"/>       | <input type="checkbox"/> | <input type="checkbox"/> | <input type="checkbox"/> | <input type="checkbox"/> | <input type="checkbox"/> | <input type="checkbox"/> | <input type="checkbox"/> | <input type="checkbox"/> |

| Food Items              |                                                                              | Average use over the past year |                          |                          |                          |                          |                          |                          |                          |                          |
|-------------------------|------------------------------------------------------------------------------|--------------------------------|--------------------------|--------------------------|--------------------------|--------------------------|--------------------------|--------------------------|--------------------------|--------------------------|
|                         |                                                                              | Never                          | Rarely                   | 1/month                  | 2-3/month                | 1/week                   | 2-3/week                 | 4-6/week                 | 1/day                    | 2+/day                   |
| Dairy Foods             | Whole milk (include milk on cereal and added to coffee or tea)               | <input type="checkbox"/>       | <input type="checkbox"/> | <input type="checkbox"/> | <input type="checkbox"/> | <input type="checkbox"/> | <input type="checkbox"/> | <input type="checkbox"/> | <input type="checkbox"/> | <input type="checkbox"/> |
|                         | Cream or whipped cream (include cream added to coffee or tea or on desserts) | <input type="checkbox"/>       | <input type="checkbox"/> | <input type="checkbox"/> | <input type="checkbox"/> | <input type="checkbox"/> | <input type="checkbox"/> | <input type="checkbox"/> | <input type="checkbox"/> | <input type="checkbox"/> |
|                         | Cottage cheese or yogurt                                                     | <input type="checkbox"/>       | <input type="checkbox"/> | <input type="checkbox"/> | <input type="checkbox"/> | <input type="checkbox"/> | <input type="checkbox"/> | <input type="checkbox"/> | <input type="checkbox"/> | <input type="checkbox"/> |
|                         | Other cheese such as American, processed, Swiss, or cheddar                  | <input type="checkbox"/>       | <input type="checkbox"/> | <input type="checkbox"/> | <input type="checkbox"/> | <input type="checkbox"/> | <input type="checkbox"/> | <input type="checkbox"/> | <input type="checkbox"/> | <input type="checkbox"/> |
| Desserts and Snacks     | Ice cream                                                                    | <input type="checkbox"/>       | <input type="checkbox"/> | <input type="checkbox"/> | <input type="checkbox"/> | <input type="checkbox"/> | <input type="checkbox"/> | <input type="checkbox"/> | <input type="checkbox"/> | <input type="checkbox"/> |
|                         | Frozen yogurt, ice milk, or sherbet                                          | <input type="checkbox"/>       | <input type="checkbox"/> | <input type="checkbox"/> | <input type="checkbox"/> | <input type="checkbox"/> | <input type="checkbox"/> | <input type="checkbox"/> | <input type="checkbox"/> | <input type="checkbox"/> |
|                         | Cookies                                                                      | <input type="checkbox"/>       | <input type="checkbox"/> | <input type="checkbox"/> | <input type="checkbox"/> | <input type="checkbox"/> | <input type="checkbox"/> | <input type="checkbox"/> | <input type="checkbox"/> | <input type="checkbox"/> |
|                         | Cake                                                                         | <input type="checkbox"/>       | <input type="checkbox"/> | <input type="checkbox"/> | <input type="checkbox"/> | <input type="checkbox"/> | <input type="checkbox"/> | <input type="checkbox"/> | <input type="checkbox"/> | <input type="checkbox"/> |
|                         | Baked or fried pies or cobblers                                              | <input type="checkbox"/>       | <input type="checkbox"/> | <input type="checkbox"/> | <input type="checkbox"/> | <input type="checkbox"/> | <input type="checkbox"/> | <input type="checkbox"/> | <input type="checkbox"/> | <input type="checkbox"/> |
|                         | Doughnuts, sweet rolls, pastry, danish, muffins, or croissants               | <input type="checkbox"/>       | <input type="checkbox"/> | <input type="checkbox"/> | <input type="checkbox"/> | <input type="checkbox"/> | <input type="checkbox"/> | <input type="checkbox"/> | <input type="checkbox"/> | <input type="checkbox"/> |
|                         | Chocolate candy or candy bars                                                | <input type="checkbox"/>       | <input type="checkbox"/> | <input type="checkbox"/> | <input type="checkbox"/> | <input type="checkbox"/> | <input type="checkbox"/> | <input type="checkbox"/> | <input type="checkbox"/> | <input type="checkbox"/> |
|                         | Peanuts or other nuts                                                        | <input type="checkbox"/>       | <input type="checkbox"/> | <input type="checkbox"/> | <input type="checkbox"/> | <input type="checkbox"/> | <input type="checkbox"/> | <input type="checkbox"/> | <input type="checkbox"/> | <input type="checkbox"/> |
|                         | Potato chips, corn chips, fried pork skins, or cheese curls                  | <input type="checkbox"/>       | <input type="checkbox"/> | <input type="checkbox"/> | <input type="checkbox"/> | <input type="checkbox"/> | <input type="checkbox"/> | <input type="checkbox"/> | <input type="checkbox"/> | <input type="checkbox"/> |
|                         | Crackers or pretzels (include cheese and peanut butter crackers)             | <input type="checkbox"/>       | <input type="checkbox"/> | <input type="checkbox"/> | <input type="checkbox"/> | <input type="checkbox"/> | <input type="checkbox"/> | <input type="checkbox"/> | <input type="checkbox"/> | <input type="checkbox"/> |
| Beverages               | Popcorn                                                                      | <input type="checkbox"/>       | <input type="checkbox"/> | <input type="checkbox"/> | <input type="checkbox"/> | <input type="checkbox"/> | <input type="checkbox"/> | <input type="checkbox"/> | <input type="checkbox"/> | <input type="checkbox"/> |
|                         | Carbonated regular soft drinks (such as Coke, Sprite, etc.)                  | <input type="checkbox"/>       | <input type="checkbox"/> | <input type="checkbox"/> | <input type="checkbox"/> | <input type="checkbox"/> | <input type="checkbox"/> | <input type="checkbox"/> | <input type="checkbox"/> | <input type="checkbox"/> |
|                         | Diet Coke, diet sodas, or other diet drinks                                  | <input type="checkbox"/>       | <input type="checkbox"/> | <input type="checkbox"/> | <input type="checkbox"/> | <input type="checkbox"/> | <input type="checkbox"/> | <input type="checkbox"/> | <input type="checkbox"/> | <input type="checkbox"/> |
|                         | Regular coffee (brewed or instant)                                           | <input type="checkbox"/>       | <input type="checkbox"/> | <input type="checkbox"/> | <input type="checkbox"/> | <input type="checkbox"/> | <input type="checkbox"/> | <input type="checkbox"/> | <input type="checkbox"/> | <input type="checkbox"/> |
|                         | Decaffeinated coffee (brewed or instant)                                     | <input type="checkbox"/>       | <input type="checkbox"/> | <input type="checkbox"/> | <input type="checkbox"/> | <input type="checkbox"/> | <input type="checkbox"/> | <input type="checkbox"/> | <input type="checkbox"/> | <input type="checkbox"/> |
| Seasonings & Flavorings | Tea (hot or iced, but not herbal)                                            | <input type="checkbox"/>       | <input type="checkbox"/> | <input type="checkbox"/> | <input type="checkbox"/> | <input type="checkbox"/> | <input type="checkbox"/> | <input type="checkbox"/> | <input type="checkbox"/> | <input type="checkbox"/> |
|                         | Gravy added to potatoes, meat, or biscuits                                   | <input type="checkbox"/>       | <input type="checkbox"/> | <input type="checkbox"/> | <input type="checkbox"/> | <input type="checkbox"/> | <input type="checkbox"/> | <input type="checkbox"/> | <input type="checkbox"/> | <input type="checkbox"/> |
|                         | Garlic                                                                       | <input type="checkbox"/>       | <input type="checkbox"/> | <input type="checkbox"/> | <input type="checkbox"/> | <input type="checkbox"/> | <input type="checkbox"/> | <input type="checkbox"/> | <input type="checkbox"/> | <input type="checkbox"/> |
|                         | Salt added to food at the table                                              | <input type="checkbox"/>       | <input type="checkbox"/> | <input type="checkbox"/> | <input type="checkbox"/> | <input type="checkbox"/> | <input type="checkbox"/> | <input type="checkbox"/> | <input type="checkbox"/> | <input type="checkbox"/> |
|                         | Sugar in coffee, tea, or on cereal                                           | <input type="checkbox"/>       | <input type="checkbox"/> | <input type="checkbox"/> | <input type="checkbox"/> | <input type="checkbox"/> | <input type="checkbox"/> | <input type="checkbox"/> | <input type="checkbox"/> | <input type="checkbox"/> |



**82. How long has it been since you last had a drink containing any kind of alcohol (this includes beer, wine and liquor)?**

- ☐ Never drank any alcohol in lifetime → **Go to question 86.**  
☐ Within the last 24 hours  
☐ One to 6 days ago  
☐ One to 4 weeks ago  
☐ One to 11 months ago  
☐ One year or more ago → **Go to question 84.**

**83. Over the past year, how often did you drink:**

|                     | Never                                    | Rarely                   | 1/month                  | 2-3/month                | 1/week                   | 2-3/week                 | 4-6/week                 | 1/day                    | 2+/day                   |                                                                                                                              |
|---------------------|------------------------------------------|--------------------------|--------------------------|--------------------------|--------------------------|--------------------------|--------------------------|--------------------------|--------------------------|------------------------------------------------------------------------------------------------------------------------------|
| Alcoholic Beverages | Light beer                               | <input type="checkbox"/> | <input type="checkbox"/> | <input type="checkbox"/> | <input type="checkbox"/> | <input type="checkbox"/> | <input type="checkbox"/> | <input type="checkbox"/> | <input type="checkbox"/> | } → When you drank beer, how many beers did you have on a typical occasion? <input type="text"/>                             |
|                     | Regular beer, ale, malt liquor, or stout | <input type="checkbox"/> | <input type="checkbox"/> | <input type="checkbox"/> | <input type="checkbox"/> | <input type="checkbox"/> | <input type="checkbox"/> | <input type="checkbox"/> | <input type="checkbox"/> |                                                                                                                              |
|                     | White wine or white wine coolers         | <input type="checkbox"/> | <input type="checkbox"/> | <input type="checkbox"/> | <input type="checkbox"/> | <input type="checkbox"/> | <input type="checkbox"/> | <input type="checkbox"/> | <input type="checkbox"/> | → When you drank white wine or white wine coolers, how many glasses did you have on a typical occasion? <input type="text"/> |
|                     | Red wine or red wine coolers             | <input type="checkbox"/> | <input type="checkbox"/> | <input type="checkbox"/> | <input type="checkbox"/> | <input type="checkbox"/> | <input type="checkbox"/> | <input type="checkbox"/> | <input type="checkbox"/> | → When you drank red wine or red wine coolers, how many glasses did you have on a typical occasion? <input type="text"/>     |
|                     | Liquor or mixed drinks                   | <input type="checkbox"/> | <input type="checkbox"/> | <input type="checkbox"/> | <input type="checkbox"/> | <input type="checkbox"/> | <input type="checkbox"/> | <input type="checkbox"/> | <input type="checkbox"/> | → When you drank liquor or mixed drinks, how many drinks did you have on a typical occasion? <input type="text"/>            |

**84. Thinking about the period in your life WHEN YOU DRANK ALCOHOL THE MOST, about how often did you drink then (this includes beer, wine and liquor)?**

- ☐ Every day  
☐ Nearly every day  
☐ 3-4 times a week  
☐ 2 times a week  
☐ once a week  
☐ 2-3 times a month  
☐ once a month  
☐ 7-11 times a year  
☐ 3-6 times a year  
☐ 1-2 times a year or less

**85. Thinking about that period in your life WHEN YOU DRANK ALCOHOL THE MOST, about how many drinks did you have on a typical occasion, counting all types of alcohol (this includes beer, wine and liquor)?**

drinks

## 86. Please answer the following questions about your usual eating habits over the past year.

|                                                                                                                                               | Never                    | Rarely                   | 1/month                  | 2-3/month                | 1/week                   | 2-3/week                 | 4-6/week                 | 1/day                    | 2+/day                   |
|-----------------------------------------------------------------------------------------------------------------------------------------------|--------------------------|--------------------------|--------------------------|--------------------------|--------------------------|--------------------------|--------------------------|--------------------------|--------------------------|
| How often do you try to restrict your food intake in order to lose weight or to keep from gaining weight?                                     | <input type="checkbox"/> | <input type="checkbox"/> | <input type="checkbox"/> | <input type="checkbox"/> | <input type="checkbox"/> | <input type="checkbox"/> | <input type="checkbox"/> | <input type="checkbox"/> | <input type="checkbox"/> |
| How often do you overeat, that is eating until you feel stuffed or too full?                                                                  | <input type="checkbox"/> | <input type="checkbox"/> | <input type="checkbox"/> | <input type="checkbox"/> | <input type="checkbox"/> | <input type="checkbox"/> | <input type="checkbox"/> | <input type="checkbox"/> | <input type="checkbox"/> |
| How often do you eat unplanned snacks? That is, how often do you find yourself snacking on food then thinking, "I wish I had not eaten that"? | <input type="checkbox"/> | <input type="checkbox"/> | <input type="checkbox"/> | <input type="checkbox"/> | <input type="checkbox"/> | <input type="checkbox"/> | <input type="checkbox"/> | <input type="checkbox"/> | <input type="checkbox"/> |
| How often do you eat as a way to cope with negative feelings like anger, unhappiness, stress, or depression?                                  | <input type="checkbox"/> | <input type="checkbox"/> | <input type="checkbox"/> | <input type="checkbox"/> | <input type="checkbox"/> | <input type="checkbox"/> | <input type="checkbox"/> | <input type="checkbox"/> | <input type="checkbox"/> |
| How often do you eat at restaurants including fast food restaurants?                                                                          | <input type="checkbox"/> | <input type="checkbox"/> | <input type="checkbox"/> | <input type="checkbox"/> | <input type="checkbox"/> | <input type="checkbox"/> | <input type="checkbox"/> | <input type="checkbox"/> | <input type="checkbox"/> |

## 87. Over the past year:

|                                                                     | Most of the time         | Some of the time         | Never                    |
|---------------------------------------------------------------------|--------------------------|--------------------------|--------------------------|
| When you ate greens or vegetables, how often were they cooked with: |                          |                          |                          |
| Butter (real butter, not margarine)                                 | <input type="checkbox"/> | <input type="checkbox"/> | <input type="checkbox"/> |
| Margarine                                                           | <input type="checkbox"/> | <input type="checkbox"/> | <input type="checkbox"/> |
| Lard, salt pork, or bacon fat                                       | <input type="checkbox"/> | <input type="checkbox"/> | <input type="checkbox"/> |
| Oil                                                                 | <input type="checkbox"/> | <input type="checkbox"/> | <input type="checkbox"/> |
| When you ate meat, how often did you trim off the fat?              | <input type="checkbox"/> | <input type="checkbox"/> | <input type="checkbox"/> |
| Most of the time                                                    | <input type="checkbox"/> | Never                    |                          |
| Some of the time                                                    | <input type="checkbox"/> | I don't eat meat         |                          |
| When you ate chicken, how often did you eat the skin?               | <input type="checkbox"/> | <input type="checkbox"/> | <input type="checkbox"/> |
| Most of the time                                                    | <input type="checkbox"/> | Never                    |                          |
| Some of the time                                                    | <input type="checkbox"/> | I don't eat chicken      |                          |
| When you ate margarine, what kind of margarine did you usually use? |                          |                          |                          |
| Regular Calorie Stick                                               | <input type="checkbox"/> | Low Calorie              |                          |
| Regular Calorie Tub                                                 | <input type="checkbox"/> | I don't use Margarine    |                          |

# VITAMINS AND SUPPLEMENTS

## 88. During the past year, have you taken any vitamin, mineral, herbal or other nutritional supplements regularly, at least once a month?

☐ Yes

☐ No → Go to question 90.

## 89. In the past year, how often have you taken:

|                                                                                                                       | Never                    | Rarely                   | 1/month                  | 2-3/month                | 1/week                   | 2-3/week                 | 4-6/week                 | 1/day                    | 2+/day                   |
|-----------------------------------------------------------------------------------------------------------------------|--------------------------|--------------------------|--------------------------|--------------------------|--------------------------|--------------------------|--------------------------|--------------------------|--------------------------|
| Multiple vitamins (such as, One-a-day, Centrum, Thera type Stress Tabs, or B-complex type)                            | <input type="checkbox"/> | <input type="checkbox"/> | <input type="checkbox"/> | <input type="checkbox"/> | <input type="checkbox"/> | <input type="checkbox"/> | <input type="checkbox"/> | <input type="checkbox"/> | <input type="checkbox"/> |
| <i>The following items refer to individual supplements only and not supplements that are part of a multi-vitamin.</i> |                          |                          |                          |                          |                          |                          |                          |                          |                          |
| Vitamin A                                                                                                             | <input type="checkbox"/> | <input type="checkbox"/> | <input type="checkbox"/> | <input type="checkbox"/> | <input type="checkbox"/> | <input type="checkbox"/> | <input type="checkbox"/> | <input type="checkbox"/> | <input type="checkbox"/> |
| Vitamin C                                                                                                             | <input type="checkbox"/> | <input type="checkbox"/> | <input type="checkbox"/> | <input type="checkbox"/> | <input type="checkbox"/> | <input type="checkbox"/> | <input type="checkbox"/> | <input type="checkbox"/> | <input type="checkbox"/> |
| Vitamin E                                                                                                             | <input type="checkbox"/> | <input type="checkbox"/> | <input type="checkbox"/> | <input type="checkbox"/> | <input type="checkbox"/> | <input type="checkbox"/> | <input type="checkbox"/> | <input type="checkbox"/> | <input type="checkbox"/> |
| Folic Acid or Folate                                                                                                  | <input type="checkbox"/> | <input type="checkbox"/> | <input type="checkbox"/> | <input type="checkbox"/> | <input type="checkbox"/> | <input type="checkbox"/> | <input type="checkbox"/> | <input type="checkbox"/> | <input type="checkbox"/> |
| Calcium                                                                                                               | <input type="checkbox"/> | <input type="checkbox"/> | <input type="checkbox"/> | <input type="checkbox"/> | <input type="checkbox"/> | <input type="checkbox"/> | <input type="checkbox"/> | <input type="checkbox"/> | <input type="checkbox"/> |
| Zinc                                                                                                                  | <input type="checkbox"/> | <input type="checkbox"/> | <input type="checkbox"/> | <input type="checkbox"/> | <input type="checkbox"/> | <input type="checkbox"/> | <input type="checkbox"/> | <input type="checkbox"/> | <input type="checkbox"/> |
| Ginkgo                                                                                                                | <input type="checkbox"/> | <input type="checkbox"/> | <input type="checkbox"/> | <input type="checkbox"/> | <input type="checkbox"/> | <input type="checkbox"/> | <input type="checkbox"/> | <input type="checkbox"/> | <input type="checkbox"/> |
| Ginseng                                                                                                               | <input type="checkbox"/> | <input type="checkbox"/> | <input type="checkbox"/> | <input type="checkbox"/> | <input type="checkbox"/> | <input type="checkbox"/> | <input type="checkbox"/> | <input type="checkbox"/> | <input type="checkbox"/> |
| St. John's Wort                                                                                                       | <input type="checkbox"/> | <input type="checkbox"/> | <input type="checkbox"/> | <input type="checkbox"/> | <input type="checkbox"/> | <input type="checkbox"/> | <input type="checkbox"/> | <input type="checkbox"/> | <input type="checkbox"/> |
| Garlic pills                                                                                                          | <input type="checkbox"/> | <input type="checkbox"/> | <input type="checkbox"/> | <input type="checkbox"/> | <input type="checkbox"/> | <input type="checkbox"/> | <input type="checkbox"/> | <input type="checkbox"/> | <input type="checkbox"/> |



**90. How frequently do you grill or barbeque foods over charcoal, or on a gas or electric grill?**

- ☐ Never  
☐ Rarely  
☐ Once per month  
☐ 2-3 times per month
- ☐ Once per week  
☐ 2-3 times per week  
☐ 4-6 times per week  
☐ Once per day  
☐ 2 or more times per day

**91. When you eat the following foods, are they usually cooked so that the INSIDE COLOR is:**

**Brown**

## Pink

Red

**I don't eat this food**

hamburger or cheeseburger

Other red meat, like steak or roast beef



□



92. When you eat red meat like hamburgers, steak or roast beef, is it usually cooked so that the OUTSIDE COLOR is:

- ☐ Light brown
- ☐ Medium brown
- ☐ Dark brown
- ☐ Black
- ☐ I don't eat red meat

## ADDITIONAL CONTACT INFORMATION

**93. Can you please provide us with the name and telephone numbers of two close friends or family members (not living with you) who would know how to contact you if you moved:**

**Name of friend or family member:**

**Telephone number of friend or family member:**

$$(\quad \quad \quad) \quad \quad \quad - \quad \quad \quad$$

**Name of friend or family member:**

**Telephone number of friend or family member:**

$$(\quad \quad) \quad \quad - \quad \quad$$

**94. Can you please provide us with your Social Security number:**



*Collecting your social security number allows us to check health and death registries (like the National Death Index and state cancer registries) in the future to obtain information about which study participants may have passed away or been diagnosed with cancer. This type of tracing is important to the study. We will keep your social security number confidential.*

***Thank you for completing this questionnaire!***

***Please make sure that you have fully completed the study consent form in this booklet, and mail the entire booklet back to us in the enclosed postage-paid envelope.***

EliteView™ forms by Pearson NCS MM233228-2 321 Printed in U.S.A.

PLEASE DO NOT WRITE IN THIS AREA

[illegible]
